# Supplementary material
Source: HighWire-hosted journal article supplement (https://www.cmajopen.ca/highwire/filestream/88926/field_highwire_adjunct_files/3/open-2022-0118-4-at.pdf)
Supplement: open-2022-0118-4-at.pdf [file open-2022-0118-4-at.pdf]

**Appendix 4**—Measures of association between First Nation status (reference general population) and each of the study outcomes, matched cohort#2 (Rezaie and colleagues' case definition)

| Outcomes                            | Stratified analysis            |                            |                          |                             |                               |                              |
|-------------------------------------|--------------------------------|----------------------------|--------------------------|-----------------------------|-------------------------------|------------------------------|
|                                     | Full-group analysis<br>(n=990) |                            | Crohn's Disease (n=526)  |                             | Ulcerative Colitis<br>(n=464) |                              |
|                                     | Unadjusted<br>HR<br>(95%CI)    | Adjusted<br>HR<br>(95%CI)* | Unadjusted<br>HR (95%CI) | Adjusted<br>HR<br>(95%CI)** | Unadjusted<br>HR<br>(95%CI)   | Adjusted<br>HR<br>(95%CI)*** |
| Outpatient gastroenterologist visit | 0.86<br>(0.70-1.05)            | 0.87 (0.71-1.06)           | 0.80 (0.58-1.10)         | 0.81 (0.59-1.11)            | 0.90 (0.70-1.17)              | 0.91 (0.70-1.18)             |
| Colonoscopy                         | 0.96 (0.79-1.18)               | 0.90 (0.73-1.10)           | 0.82 (0.58-1.15)         | 0.81 (0.58-1.15)            | 0.95 (0.73-1.22)              | 0.95 (0.74-1.23)             |
| Prescription claim for IBD          | <b>0.74 (0.61-0.90)</b>        | <b>0.68 (0.56-0.83)</b>    | <b>0.61 (0.44-0.86)</b>  | <b>0.61 (0.43-0.85)</b>     | <b>0.74 (0.58-0.95)</b>       | <b>0.74 (0.57-0.95)</b>      |
| Prescription claim of a Biologic    | 0.66 (0.42-1.05)               | 0.74 (0.46-1.17)           | 0.77 (0.43-1.39)         | 0.78 (0.43-1.41)            | 0.67 (0.32-1.41)              | 0.67 (0.32-1.42)             |
| Prescription claim of an IM         | <b>0.66 (0.44-0.93)</b>        | 0.74 (0.52-1.05)           | 0.63 (0.39-1.04)         | 0.65 (0.40-1.07)            | 0.82 (0.50-1.36)              | 0.85 (0.51-1.42)             |
| Prescription claim of a 5-ASA       | 0.86 (0.70-1.06)               | <b>0.74 (0.60-0.91)</b>    | <b>0.66 (0.45-0.97)</b>  | <b>0.63 (0.43-0.92)</b>     | 0.80 (0.62-1.03)              | 0.79 (0.62-1.02)             |
| IBD-specific hospitalization        | 1.21 (0.93-1.56)               | 1.28 (0.99-1.67)           | 1.28 (0.88-1.86)         | 1.31 (0.90-1.91)            | 1.25 (0.87-1.80)              | 1.25 (0.87-1.80)             |
| IBD-related hospitalization         | <b>1.33 (1.04-1.68)</b>        | <b>1.39 (1.09-1.77)</b>    | 1.29 (0.90-1.84)         | 1.28 (0.89-1.83)            | <b>1.48 (1.06-2.06)</b>       | <b>1.47 (1.06-2.05)</b>      |
| Surgery for IBD                     | 1.06 (0.76-1.48)               | 1.04 (0.74-1.46)           | 0.83 (0.48-1.43)         | 0.82 (0.47-1.43)            | 1.26 (0.82-1.94)              | 1.23 (0.80-1.89)             |

HR: hazard ratio, 95%CI: 95% confidence interval. Bold values denote statistically significant results.

\* Models adjusted by rural or urban status, and diagnostic type (n=986).

\*\* Crohn's Disease group, models adjusted by rural or urban status (n=524).

\*\*\* Ulcerative colitis group, models adjusted by rural or urban status (n=462).

Appendix 4, as supplied by the authors. Appendix to: Marques Santos JD, Fowler S, Jennings D, et al. Health care utilization differences between First Nations people and the general population with inflammatory bowel disease: a retrospective cohort study from Saskatchewan, Canada. CMAJ Open 2022. doi:10.9778/cmajo.20220118. Copyright © 2022 The Author(s) or their employer(s). To receive this resource in an accessible format, please contact us at cmajgroup@cmaj.ca.
